# Supplementary material
Source: PubMed Central journal article supplement (PMC4511596)
Supplement: NIHMS707815-supplement-Suppl.pdf [file NIHMS707815-supplement-Suppl.pdf]

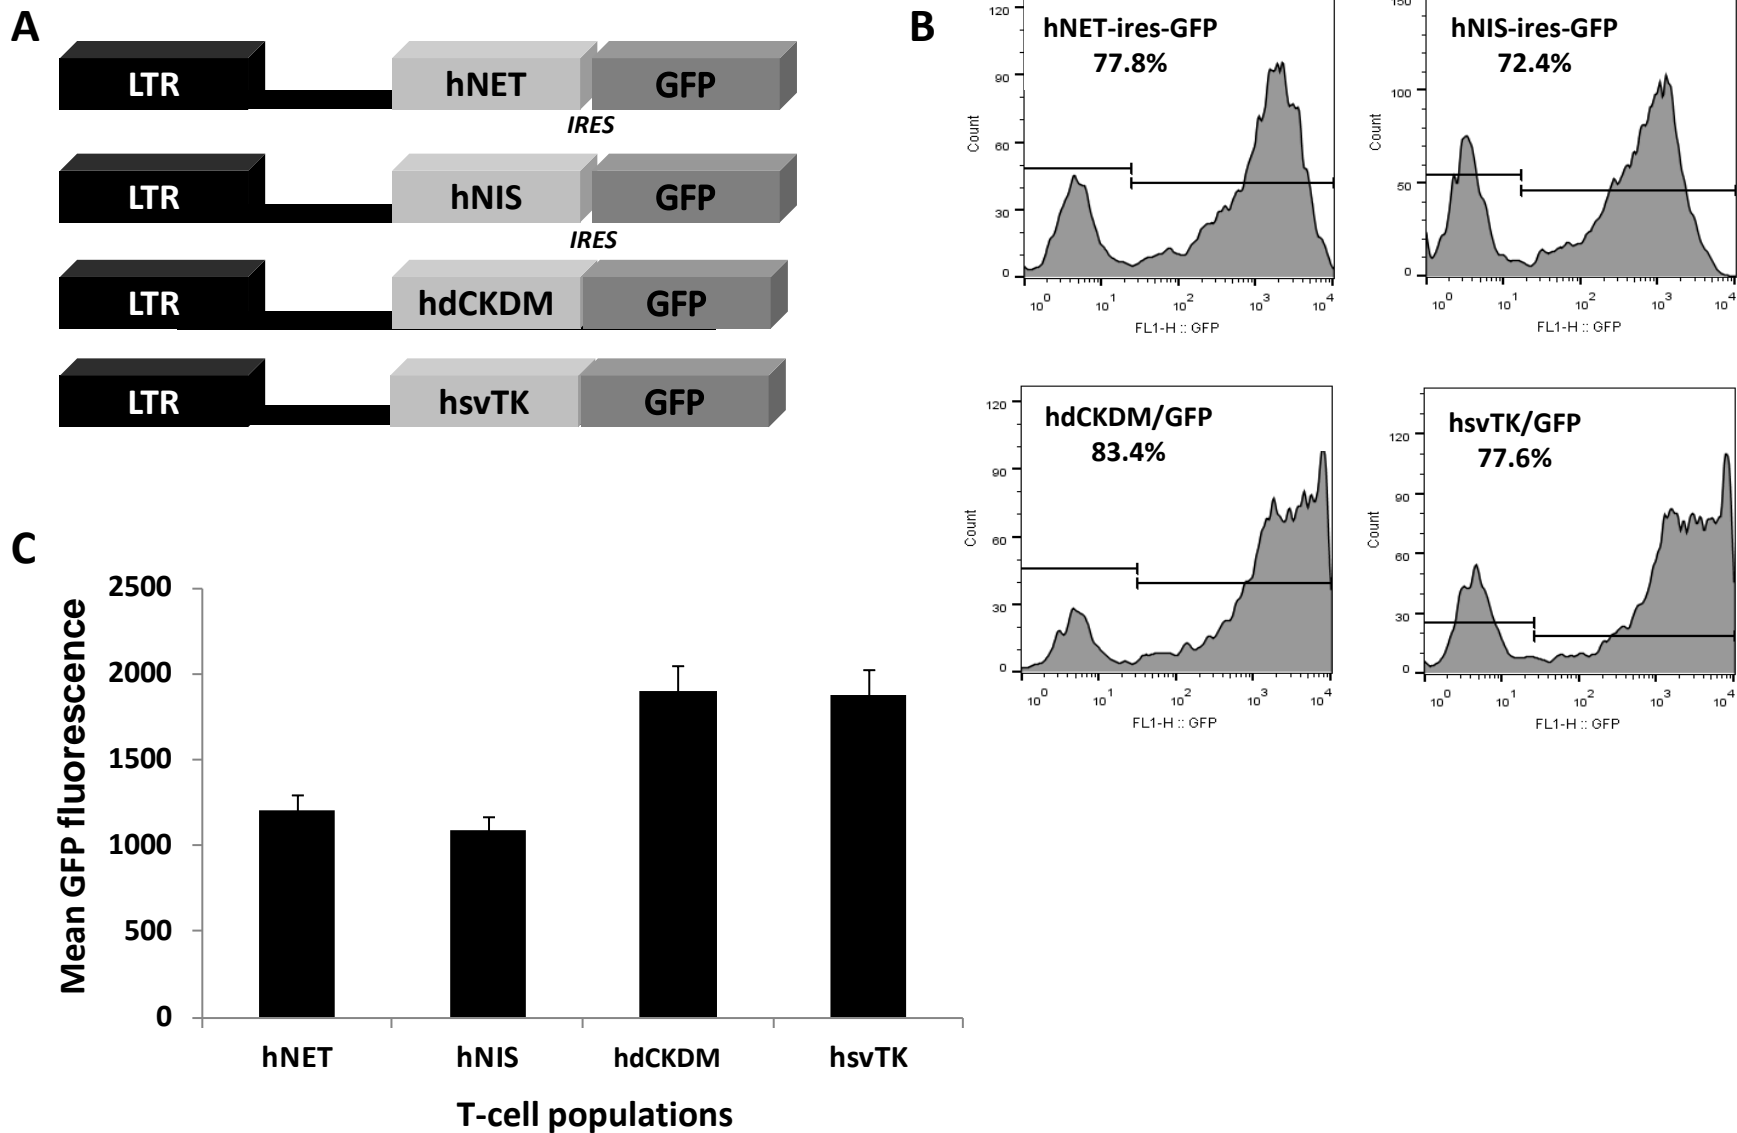

**Supplemental Figure 1.** Structures of four retroviral vectors bearing IRES-linked dual reporter genes (hNET-ires-GFP and hNIS-ires-GFP), and fusion dual reporter genes (hdCKDM/GFP and hsvTK/GFP) (A). FACS analysis of GFP reporter gene expression (B). Mean GFP fluorescence - arbitrary units (C).

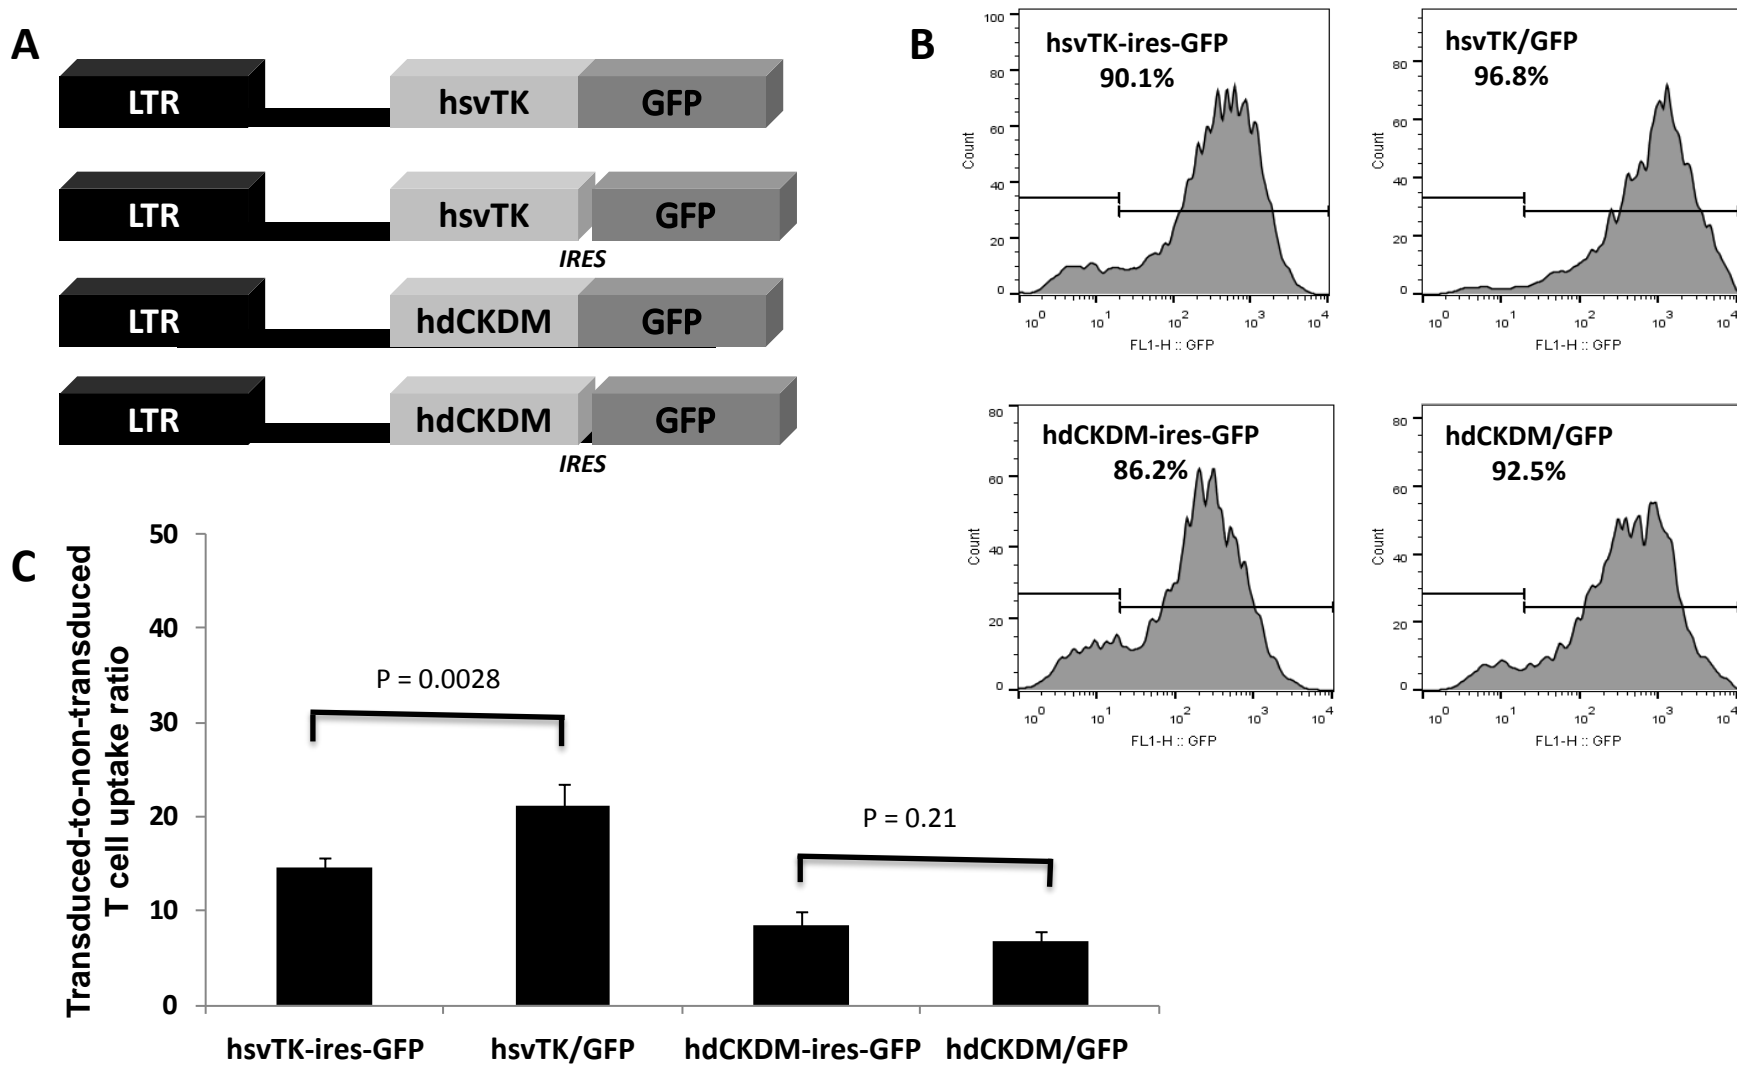

**Supplemental Figure 2.** Structures of retroviral vectors bearing hsvTK, hdCKDM and GFP dual reporter genes involving both fusion and IRES-linked constructs (A). FACS analysis of reporter gene expression (GFP); % transduced cells (B). A comparison of fusion and IRES-linked dual reporter systems, based on the accumulation of [<sup>3</sup>H]-FEAU (expressed as a transduced-to-nontransduced T cell uptake ratio) (C). T cells ( $8 \times 10^6$ ) were incubated in 8 ml of [<sup>3</sup>H]-FEAU (0.5 uCi/ml) containing media for 2 hours at 37°C (n=8 per cell line). This comparison showed no statistically significant difference between the hdCKDM-GFP and hdCKDM-ires-GFP reporter-transduced T cells, and only a small difference (1.4-fold) between the hsvTK-GFP and hsvTK-ires-GFP reporter-transduced T cells.

**A**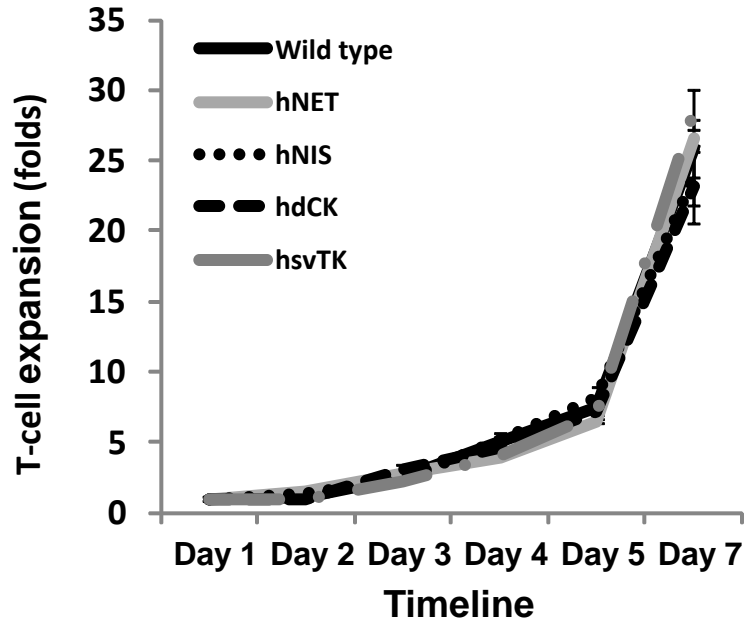**B**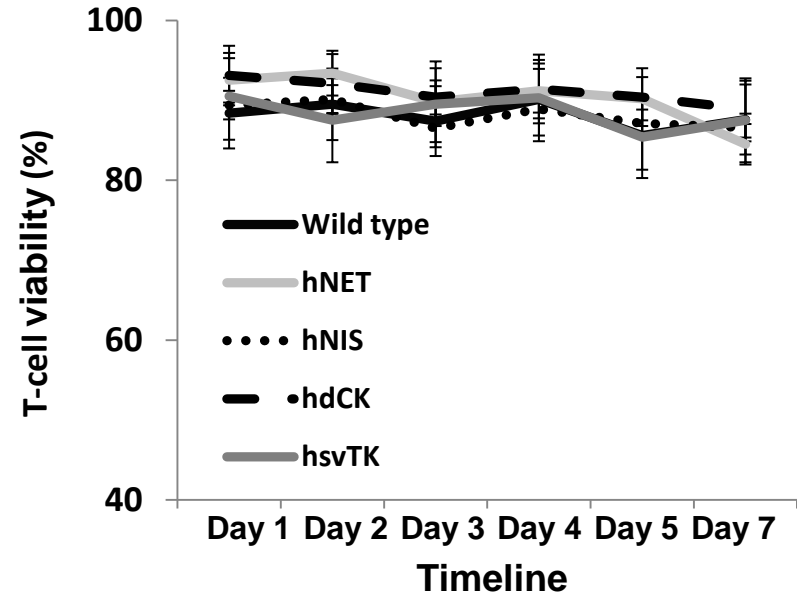

**Supplemental Figure 3.** Comparative assessment of T-cell expansion (**A**) and viability (**B**) following stimulation.

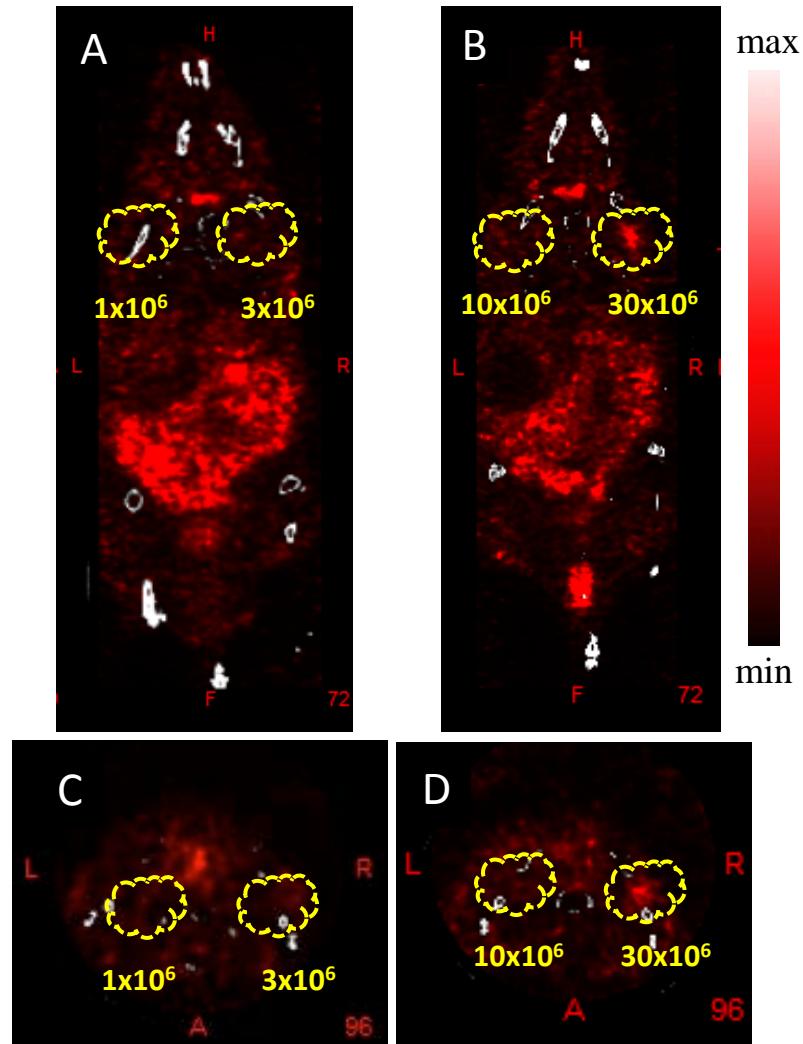

**Supplemental Figure 4.** SPECT-CT imaging of human T cells transduced with the hNET-ires-GFP reporter. Different numbers of T cells were injected subcutaneously, followed by systemic administration of [<sup>123</sup>I]MIBG. The number and site of injected T cells is shown in yellow; the [<sup>123</sup>I]MIBG SPECT-CT image obtained at 4 hours post-injection is shown in red.

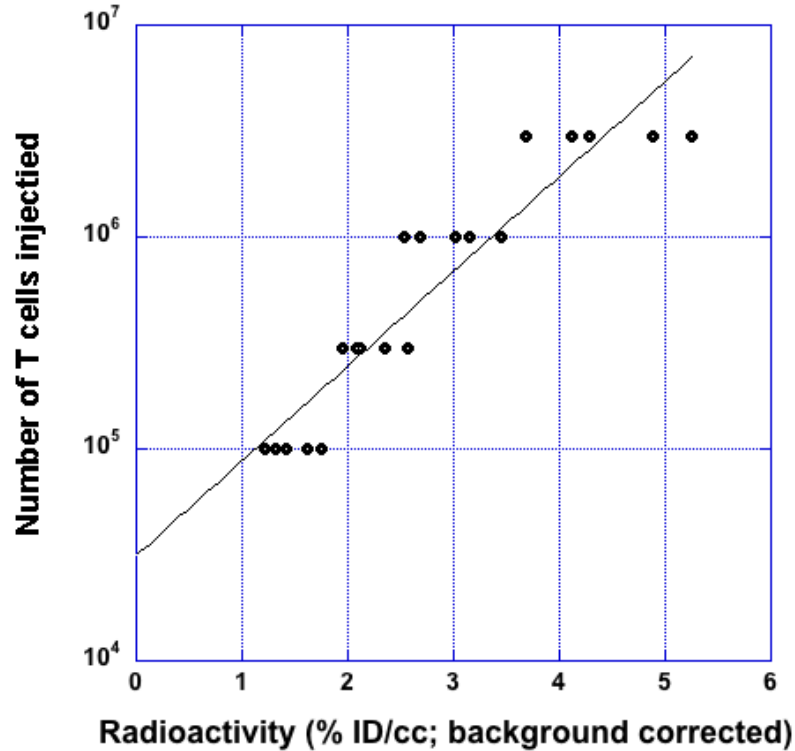

**Supplemental Figure 5.** Plot of T cell number vs background-corrected radioactivity (% ID/cc) measured at the T cell injection site. Human T cells transduced with the hNET-ires-GFP reporter were imaged 4 hours after i.v. injection of [ $^{18}\text{F}$ ]-MFBG. Different numbers of T cells were injected subcutaneously, followed by systemic administration of [ $^{123}\text{I}$ ]MIBG. The equation describing the relationship is: T cell number at the injection site =  $31,515 \times e^{[1.03 \times (\text{measured \% injected radioactivity/g} - \text{background})]}$ ; ( $R=0.80$ ).
